# Supplementary material for: Investigating the vital influence of multi-factor synergies on the formation of nitrate on the surface of nano MgO particles
Source: Royal Society of Chemistry journal article supplement (doi:10.1039/d4en00316k), 2024-01-01
Supplement: d4en00316k1.pdf [file d4en00316k1.pdf]

## Supplementary Information

### Investigating the vital influences of multi-factor synergies on the nitrate formations on the surface of nano MgO particles

Lihui Han,<sup>a,b\*</sup> Chaonan Qi,<sup>a</sup> Jian Tian,<sup>a</sup> Tong Lan,<sup>a</sup> Qian Xiao,<sup>a</sup> Shuiyuan Cheng,<sup>a,b</sup> Wei Wei,<sup>a,b</sup> Haiyan Wang,<sup>a,b</sup> Jinghua Guo<sup>c</sup> and Aihua Zheng<sup>c</sup>

<sup>a</sup> College of Environmental Sciences and Technology, Beijing University of Technology, Beijing 100124, China

<sup>b</sup> Key Laboratory of Beijing on Regional Air Pollution Control, Beijing 100124, China

<sup>c</sup> Analysis and Testing Center, Beijing Normal University, Beijing 100875, China

Correspondence to L. H. Han ([hlh@bjut.edu.cn](mailto:hlh@bjut.edu.cn))

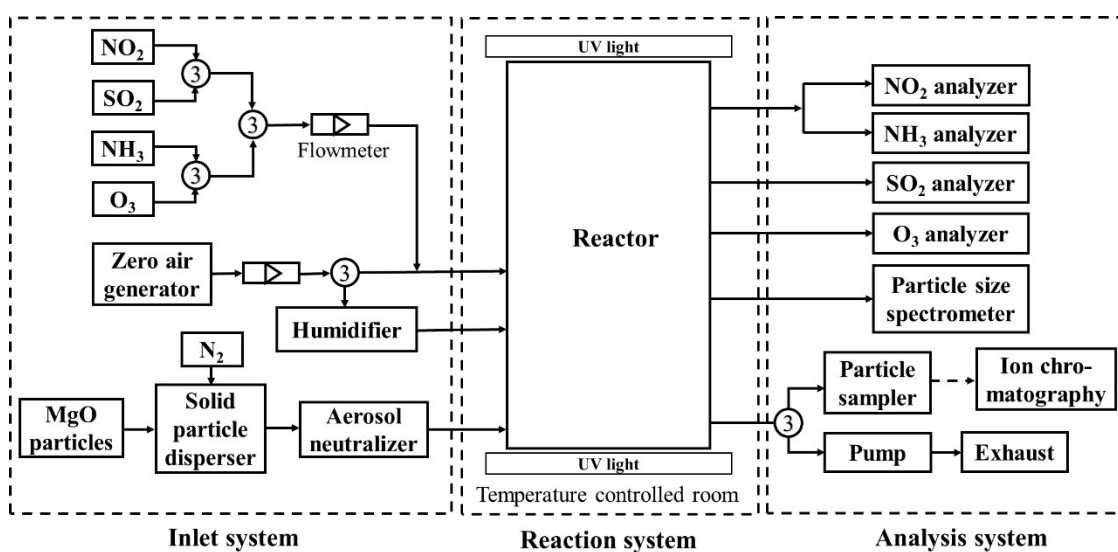

Fig.S1 Schematic of smog chamber set up at BJUT, 3: three-way valve; : flowmeter.

Table S1 Characteristics of instruments used in the smog chamber experiments

| Instrument                                      | Producer and Model                                                                  | Functions                                                           | Performance Index                                                                                                                                                                      |
|-------------------------------------------------|-------------------------------------------------------------------------------------|---------------------------------------------------------------------|----------------------------------------------------------------------------------------------------------------------------------------------------------------------------------------|
| Zero-air generator                              | Thermo Fisher Science,<br>Model-111                                                 | Provides zero air                                                   | Maximum flow 20L/min; HC<br><0.1ppm; NO<0.5 ppb; NO <sub>2</sub><br><0.5ppb; O <sub>3</sub> <0.8ppb; SO <sub>2</sub> <0.5ppb;<br>NH <sub>3</sub> <0.5ppb; RH<5%; PM<1 cm <sup>-3</sup> |
| O <sub>3</sub> generator                        | Thermo Fisher Scientific,<br>Model-49i IPS                                          | Provides O <sub>3</sub>                                             | Flow: 4L/min;<br>Range of 0-1000ppb                                                                                                                                                    |
| Solid particle<br>Dispenser                     | PALAS, RBG-1000                                                                     | Produces dry nanoscale<br>particles                                 | Particle generation rate of 616mg/h                                                                                                                                                    |
| Aerosol neutralizer                             | SIMCO, Model-6110A                                                                  | Neutralize electrical properties<br>of particles                    | Dissipation time < 4 seconds<br>Ion balance < ± 25V                                                                                                                                    |
| SO <sub>2</sub> analyzer                        | Thermo Fisher Scientific,<br>Model-43i                                              | Determinate<br>concentration of SO <sub>2</sub>                     | Detection range 0-50ppm;<br>Accuracy of ±1.0ppb                                                                                                                                        |
| NO-NO <sub>2</sub> -NO <sub>x</sub><br>analyzer | Thermo Fisher Scientific,<br>Model-42i                                              | Determinate<br>concentration of NO-NO <sub>2</sub> -NO <sub>x</sub> | Detection range 0-50ppm;<br>Accuracy of ±1.0ppb                                                                                                                                        |
| O <sub>3</sub> analyzer                         | Thermo Fisher Scientific,<br>Model-49i                                              | Determinate<br>concentration of O <sub>3</sub>                      | Detection range 0-50ppm;<br>Accuracy of ±1.0ppb                                                                                                                                        |
| NH <sub>3</sub> analyzer                        | Thermo Fisher Scientific,<br>Model-17i                                              | Determinate<br>concentration of NH <sub>3</sub>                     | Detection range 0-50ppm;<br>Accuracy of ±1.0ppb                                                                                                                                        |
| Multi-Gas<br>Calibrator                         | Thermo Fisher Scientific,<br>Model-146i                                             | Calibration gas analyzer                                            | Provides accurate concentrations of<br>SO <sub>2</sub> , NO <sub>2</sub> and NH <sub>3</sub> or other gases                                                                            |
| Particle size<br>spectrometer                   | TOPAS, Model LAP322                                                                 | Measure the size<br>distribution of PM                              | Detection range of 200nm-5µm                                                                                                                                                           |
| Particle sampler                                | MSP, Model 125R<br>NanoMoudi- II TM                                                 | Membrane sampling PM                                                | Collect PM in 13 levels                                                                                                                                                                |
| Ion<br>chromatography                           | Dionex <sup>TM</sup> ICS-2100;<br>Thermo Fisher Scientific,<br>Aquion <sup>TM</sup> | Measurement of water soluble<br>anions and cations                  | Digital signal range: 0 to 15000 µS                                                                                                                                                    |

Table S2 The initial conditions of NO<sub>2</sub> heterogeneous reactions on the surface of nano MgO aerosol particles in the different reaction systems in this study period

| Exp. No. | Reaction System                   | React time (min) | Initial reaction conditions |                                    |        |        |               |                      |                       |                       |
|----------|-----------------------------------|------------------|-----------------------------|------------------------------------|--------|--------|---------------|----------------------|-----------------------|-----------------------|
|          |                                   |                  | NO <sub>2</sub> (ppb)       | MgO Particle (μg m <sup>-3</sup> ) | T (°C) | RH (%) | Lamp (number) | O <sub>3</sub> (ppb) | NH <sub>3</sub> (ppb) | SO <sub>2</sub> (ppb) |
| 1        |                                   | 300              | 320.66                      | 365.94                             | 20.0°C | 17.8%  |               |                      |                       |                       |
| 2        |                                   | 300              | 305.65                      | 346.62                             | 22.4°C | 38.1%  |               | 51.54                |                       |                       |
| 3        |                                   | 300              | 312.61                      | 359.92                             | 25.7°C | 36.6%  |               | 91.12                |                       |                       |
| 4        |                                   | 300              | 320.37                      | 350.59                             | 21.7°C | 30.1%  |               | 190.47               |                       |                       |
| 5        |                                   | 300              | 320.65                      | 372.51                             | 20.9°C | 33.3%  |               |                      | 104.35                |                       |
| 6        |                                   | 300              | 322.32                      | 389.88                             | 21.3°C | 32.0%  |               |                      | 173.05                |                       |
| 7        |                                   | 300              | 321.27                      | 386.96                             | 22.8°C | 33.6%  |               |                      | 327.11                |                       |
| 8        | NO <sub>2</sub> -MgO-Dark (Night) | 300              | 338.23                      | 384.69                             | 20.2°C | 28.9%  |               |                      |                       | 78.70                 |
| 9        |                                   | 300              | 332.83                      | 364.47                             | 21.3°C | 32.9%  |               |                      |                       | 167.10                |
| 10       |                                   | 300              | 331.09                      | 385.04                             | 23.3°C | 30.2%  |               |                      |                       | 281.66                |
| 11       |                                   | 300              | 330.50                      | 392.85                             | 22.1°C | 24.4%  |               | 92.91                | 74.98                 |                       |
| 12       |                                   | 300              | 327.19                      | 386.08                             | 21.6°C | 22.0%  |               | 100.71               | 249.19                |                       |
| 13       |                                   | 300              | 327.49                      | 372.41                             | 20.4°C | 22.7%  |               | 107.86               | 334.25                |                       |
| 14       |                                   | 300              | 321.82                      | 378.22                             | 22.7°C | 23.5%  |               | 93.20                |                       | 86.64                 |
| 15       |                                   | 300              | 333.18                      | 381.40                             | 21.7°C | 26.4%  |               | 92.39                |                       | 188.47                |
| 16       |                                   | 300              | 324.29                      | 372.12                             | 22.3°C | 25.6%  |               | 95.04                |                       | 288.21                |
| 17       |                                   | 300              | 328.44                      | 366.08                             | 19.5°C | 20.6%  | 20            |                      |                       |                       |
| 18       |                                   | 300              | 312.69                      | 366.98                             | 16.6°C | 34.4%  | 40            |                      |                       |                       |
| 19       |                                   | 300              | 326.10                      | 362.52                             | 30.7°C | 25.5%  | 40            | 94.73                |                       |                       |
| 20       |                                   | 300              | 328.97                      | 354.82                             | 32.6°C | 26.9%  | 40            | 169.74               |                       |                       |
| 21       | NO <sub>2</sub> -MgO-hv (Day)     | 300              | 348.77                      | 362.64                             | 30.8°C | 26.3%  | 40            | 286.22               |                       |                       |
| 22       |                                   | 300              | 330.42                      | 383.90                             | 21.2°C | 29.7%  | 40            |                      | 128.92                |                       |
| 23       |                                   | 300              | 331.74                      | 373.02                             | 19.9°C | 22.0%  | 40            |                      | 211.37                |                       |
| 24       |                                   | 300              | 346.82                      | 379.62                             | 19.7°C | 25.7%  | 40            |                      | 317.60                |                       |
| 25       |                                   | 300              | 339.47                      | 373.65                             | 20.3°C | 26.5%  | 40            |                      |                       | 75.52                 |
| 26       |                                   | 300              | 333.62                      | 388.86                             | 19.1°C | 22.0%  | 40            |                      |                       | 160.52                |
| 27       |                                   | 300              | 333.30                      | 398.52                             | 19.2°C | 23.4%  | 40            |                      |                       | 260.86                |
